# Supplementary material for: A V2O5 nanorod decorated graphene/polypyrrole hybrid electrode: a potential candidate for supercapacitors
Source: Royal Society of Chemistry journal article supplement (doi:10.1039/c6nj03580a), 2017-01-01
Supplement: c6nj03580a1.pdf [file c6nj03580a1.pdf]

## Supplementary Information

### **V<sub>2</sub>O<sub>5</sub> nanorods decorated Graphene /Polypyrrole Hybrid Electrode: A Potential Candidate for Supercapacitor**

Amrita De Adhikari,<sup>a</sup> Ramesh Oraon,<sup>a</sup> Santosh Kumar Tiwari,<sup>a</sup> Joong Hee Lee,<sup>b,c</sup> Nam Hoon Kim,<sup>b,c</sup> and Ganesh Chandra Nayak\*<sup>a</sup>

<sup>a</sup> Department of Applied Chemistry, IIT (ISM) Dhanbad, Dhanbad 826004, Jharkhand, India

<sup>b</sup> WCU Program, Department of BIN Fusion Technology, Chonbuk National University, Jeonju, Jeonbuk 561-756, Republic of Korea

<sup>c</sup> Department of Hydrogen and Fuel Cell Engineering, Chonbuk National University, Jeonju, Jeonbuk 561-756, Republic of Korea

\*Corresponding Author Email: nayak.g.ac@ismdhanbad.ac.in

#### **1. Cyclic Voltammetry Study in organic electrolyte (1M TEABF<sub>4</sub>/Acetonitrile):**

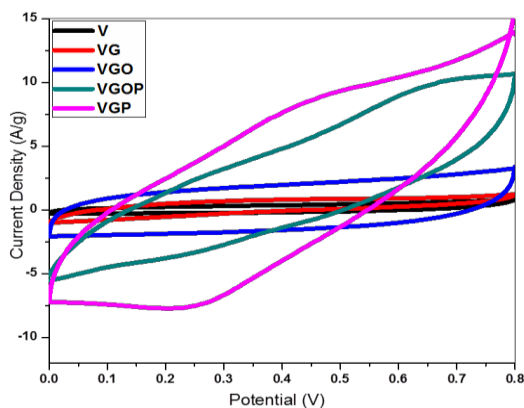

Figure S1: Cyclic voltammograms of the nanocomposites in 1(M) Acetonitrile at a scan rate 10mV/sec in a potential window (0-0.8V)

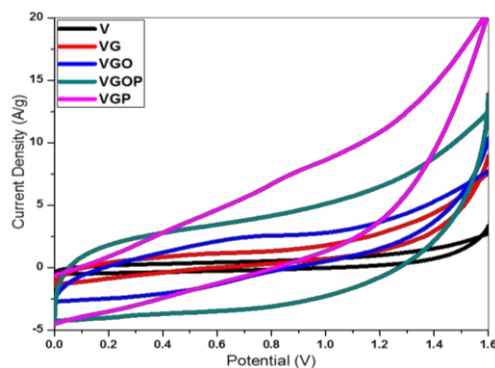

Figure S2: Cyclic voltammograms of the nanocomposites in 1(M) Acetonitrile at a scan rate 10mV/sec in a potential window (0-1.6V)

**2. Galvanostatic Charging-Discharging Analysis in organic electrolyte (1M TEABF<sub>4</sub> /Acetonitrile):**

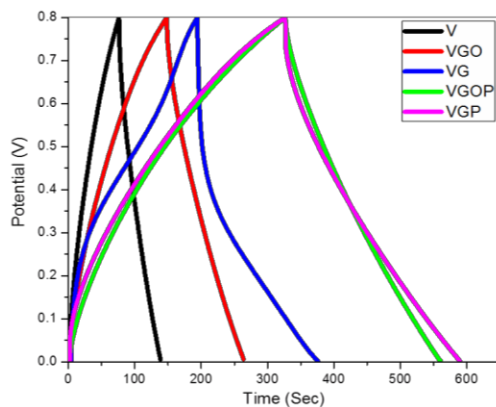

Figure S3: GCD plot of the nanocomposites in 1(M) Acetonitrile at 1A/g in a potential window (0-0.8)

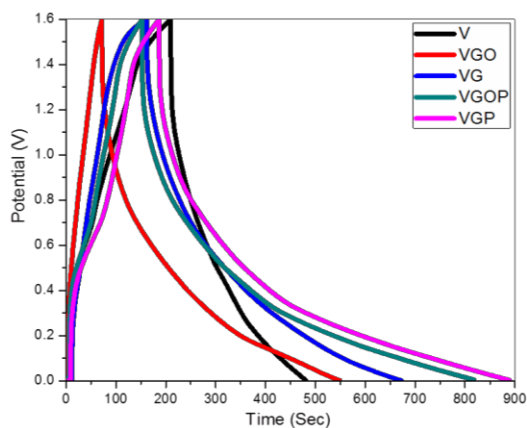

Figure S4: GCD plot of the nanocomposites 1(M) Acetonitrile at 1A/g in a potential window (0-1.6)

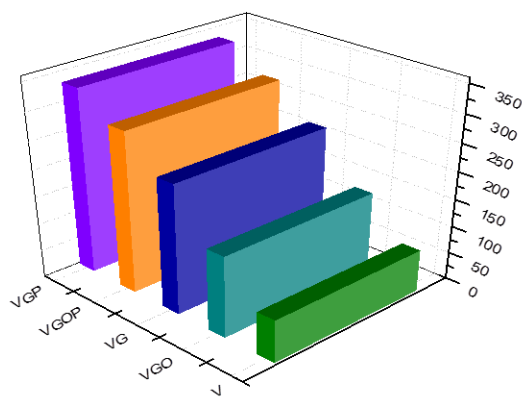

Figure S5: Bar plot of the specific capacitance (F/g) in 1(M) Acetonitrile at 1A/g in a potential window (0-0.8)

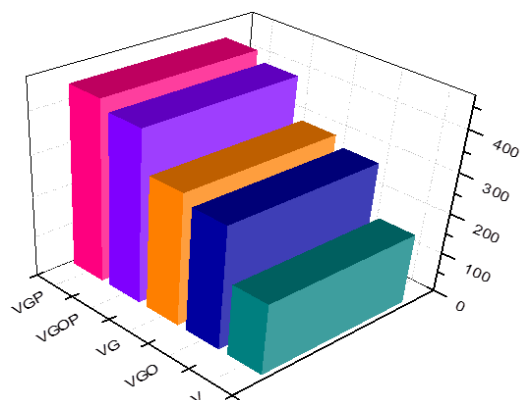

Figure S6: Bar plot of the specific capacitance (F/g) in 1(M) Acetonitrile at 1A/g in a potential window (0-1.6)

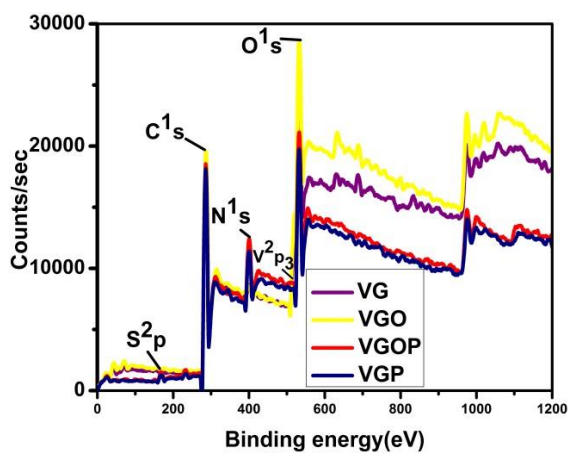

Figure S7: Wide Survey showing the various components in the various nanocomposites

### 3. Self-assembled device of as prepared electrode material for supercapacitor application

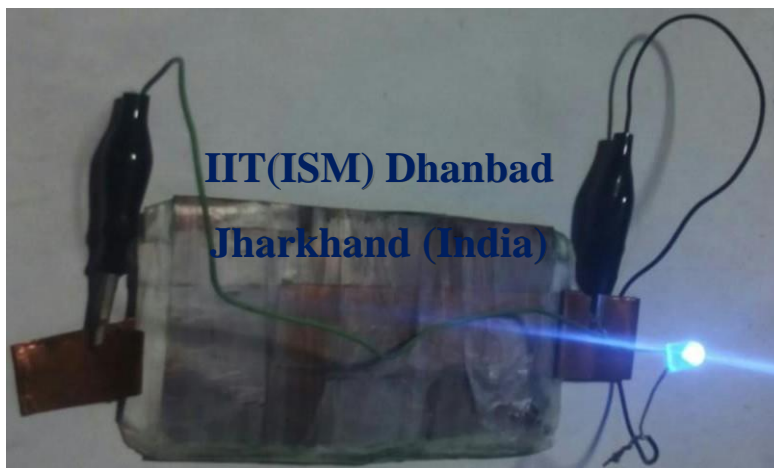

Figure S8: Self-assembled device demonstrating the practical application in supercapacitor

**Table 1**

| <b>Nanocomposite</b>                                                                    | <b>Specific Capacitance(F/g)</b> | <b>Reference</b>                                                  |
|-----------------------------------------------------------------------------------------|----------------------------------|-------------------------------------------------------------------|
| V <sub>2</sub> O <sub>5</sub> nanorods decorated Graphene /Polypyrrole Hybrid Electrode | 787                              | Present work                                                      |
| Rod like V <sub>2</sub> O <sub>5</sub> nanocrystals on rGO                              | 537                              | Li et al., ACS Appl. Mater.Interfaces,2013,5(21),pp 11462-11470   |
| Electrochemical codeposition of vanadium oxide and PPy                                  | 412                              | Bai et al., ACS Appl. Mater.Interfaces,2014,6(15),pp 12656-12664  |
| Mesoporous hybrids of V <sub>2</sub> O <sub>5</sub> nanoparticles anchored on rGO       | 466                              | Pandey et al., ACS Appl. Mater.Interfaces,2016,8(14),pp 9200-9210 |
| Graphene decorated V <sub>2</sub> O <sub>5</sub> nanobelts                              | 288                              | Lee et al.,Sci. Rep.,2015,5:8151                                  |
